# Supplementary material for: Decades of native bee biodiversity surveys at Pinnacles National Park highlight the importance of monitoring natural areas over time
Source: PubMed Central journal article supplement (PMC6336250; doi:10.1371/journal.pone.0207566), 2019-01-17
Supplement: pone.0207566.s001.pdf [file pone.0207566.s001.pdf]

**Meiners et al. 2019. Decades of native bee biodiversity surveys at Pinnacles National Park highlight the importance of monitoring natural areas over time**

## Supporting Information

**S1 Table. Names, locations, and descriptions of initial (2011-12) sampling of long-term bee monitoring study plots at Pinnacles National Park**

| <b>Site/Plot Number</b> | <b>Site/Plot Name</b> | <b>GPS lat/long</b> | <b>Elevation</b> | <b>Dimensions</b> | <b>Habitat Type</b> |
|-------------------------|-----------------------|---------------------|------------------|-------------------|---------------------|
| 1                       | McCabe Canyon Upper   | 36.5081, -121.156   | 410m             | 175 m x 57m       | Alluvial            |
| 2                       | McCabe Canyon Lower   | 36.503, -121.156    | 395m             | 175m x 57m        | Alluvial            |
| 3                       | Peaks View            | 36.4802, -121.16    | 290m             | 200m x 50m        | Alluvial            |
| 4                       | South Wilderness      | 36.4683, -121.156   | 280m             | 250m x 40m        | Live Oak Woodland   |
| 5                       | Needlegrass BOW       | 36.5091, -121.12    | 385m             | 200m x 50m        | Blue Oak Woodland   |
| 6                       | Needlegrass LOW       | 36.509, -121.129    | 365m             | 200m x 50m        | Live Oak Woodland   |
| 7                       | West Gate             | 36.4747, -121.227   | 610m             | 175m x 57m        | Blue Oak Woodland   |
| 8                       | Double Gates          | 36.4858, -121.232   | 535m             | 200m x 50m        | Grassland           |
| 9                       | W. North Wilderness   | 36.4949, -121.211   | 430m             | 200m x 50m        | Grassland           |
| 10                      | High Peaks            | 36.4907, -121.183   | 595m             | 175m x 50m        | Blue Oak Woodland   |
