# Supplementary material for: Decades of native bee biodiversity surveys at Pinnacles National Park highlight the importance of monitoring natural areas over time
Source: PubMed Central journal article supplement (PMC6336250; doi:10.1371/journal.pone.0207566), 2019-01-17
Supplement: pone.0207566.s002.pdf [file pone.0207566.s002.pdf]

Meiners et al. 2019. Decades of native bee biodiversity surveys at Pinnacles National Park highlight the importance of monitoring natural areas over time

## Supporting Information

**S2 Table. Full Pinnacles National Park bee species list, with relative abundance for each of seven collection years, proportion of years collected, and status as new (N) to or absent (A) from the current study.** Species are marked "S" for Singleton if only one specimen was collected, "R" for Rare if  $N \leq 10$ , and "C" for Common if  $N > 10$ . Dashed vertical line marks 2002 collection as separate from original 1996-9 inventory, but still prior to recent study (2011-12).

| Bee Taxonomy |              |                |                | Early Inventory |      | Bowls | Recent Inventory |      | New/ Absent in 2011-12 | Prop. years present |      |      |      |   |
|--------------|--------------|----------------|----------------|-----------------|------|-------|------------------|------|------------------------|---------------------|------|------|------|---|
| Family       | Genus        | Subgenus       | Species        | 1996            | 1997 | 1998  | 1999             | 2002 |                        |                     | 2011 | 2012 |      |   |
| Andrenidae   | Ancylandrena |                | atoposoma      | S               |      |       |                  |      |                        |                     | 0.14 | A    |      |   |
|              | Andrena      | (Anchandrena)  | quercina       |                 |      |       | R                |      |                        | R                   | R    | 0.43 |      |   |
|              |              | (Belandrena)   | nemophilae     |                 |      |       |                  | R    |                        | S                   | R    | 0.43 |      |   |
|              |              |                | palpalis       |                 |      | R     | R                |      |                        |                     |      |      | 0.29 | A |
|              |              | (Cremnandrena) | anisochlora    |                 |      |       |                  | C    |                        | C                   | R    | 0.43 |      |   |
|              |              | (Dasyandrena)  | cristata       |                 |      |       |                  | R    |                        |                     |      |      | 0.14 | A |
|              |              | (Derandrena)   | arctostaphylae |                 |      |       |                  | S    | S                      |                     |      |      | 0.29 | A |
|              |              |                | californiensis |                 |      |       |                  | R    | S                      | S                   | R    |      | 0.57 |   |
|              |              |                | n. sp.         |                 |      | S     | S                | R    |                        |                     | R    | C    | 0.71 |   |
|              |              |                | vandykei       |                 |      |       |                  | C    |                        | S                   | S    |      | 0.43 |   |
|              |              |                | viridissima    |                 |      |       |                  |      |                        |                     | R    |      | 0.14 | N |
|              |              | (Diandrena)    | apasta         |                 |      |       |                  |      |                        | S                   |      |      | 0.14 | A |
|              |              |                | chalybioides   |                 |      |       |                  |      |                        |                     |      | S    | 0.14 | N |
|              |              |                | cuneilabris    |                 |      |       |                  |      |                        |                     |      | S    | 0.14 | N |
|              |              |                | lewisorum      |                 |      | S     | R                | S    | C                      |                     | C    | C    | 0.86 |   |
|              |              |                | nothocalaidis  |                 |      |       |                  |      | S                      |                     |      |      | 0.14 | A |
|              |              |                | puthua         |                 |      |       | R                | C    |                        |                     | C    | R    | 0.57 |   |

|                  |                           |   |   |   |   |   |   |   |      |   |
|------------------|---------------------------|---|---|---|---|---|---|---|------|---|
|                  |                           |   |   | R | R | R | C | C | 0.71 |   |
| (Erandrena)      | subchalybea               |   |   |   |   |   |   |   | 0.14 | A |
|                  | principalis               |   |   |   |   |   |   |   | 0.57 |   |
|                  | astragali                 | R | S | R |   |   | S | R | 0.71 |   |
|                  | auricoma                  |   | R | C | R |   | C |   | 0.43 |   |
|                  | caerulea                  |   |   | C |   |   | R | R | 0.71 |   |
|                  | chlorura                  |   | R | C |   | R | C | C | 0.57 |   |
|                  | dissimulans               |   | R | C |   |   | C | C | 0.14 | A |
|                  | misella                   |   |   | S |   |   |   |   | 0.71 |   |
|                  | nigrocaerulea             | S | R | R |   |   | S | R | 0.43 |   |
|                  | suavis                    |   |   | R |   |   | C | C | 0.43 |   |
|                  | subdepressa               |   |   | R |   |   | R | S | 0.43 |   |
| (Genyandrena)    | mackieae                  |   | R | C |   |   | R |   | 0.57 |   |
| (Hesperandrena)  | baeriae                   |   | S | S |   |   | R | R | 0.29 | N |
|                  | compositarum              |   |   |   |   |   | S | S | 0.14 | N |
|                  | escondida                 |   |   |   |   |   |   | R | 0.29 | A |
| (Holandrena)     | cressonii ssp. infasciata |   | S |   |   | S |   |   | 1    |   |
| (Melandrena)     | cerasifolii               | C | C | C | S | S | C | C | 0.71 |   |
|                  | aff. cerasifolii          |   | C | C | C |   | C | C | 0.14 | A |
|                  | perimelas                 |   |   |   |   | S |   |   | 0.86 |   |
|                  | sola                      | R | C | C | C |   | C | C | 0.14 | A |
| (Micrandrena)    | annectens                 |   |   | R |   |   |   |   | 0.71 |   |
|                  | chlorogaster              |   | R | C |   | R | C | C | 0.14 | A |
|                  | aff. ishii                |   |   | C |   |   |   |   | 0.71 |   |
|                  | microchlora               |   | R | C | S |   | R | R | 0.71 |   |
|                  | piperi                    |   | S | R |   | S | R | R | 0.57 |   |
| (Nemandrena)     | crudeni                   |   |   | C |   | S | C | C | 0.14 | A |
|                  | subnigripes               |   |   | S |   |   |   |   | 0.86 |   |
| (Oligandrena)    | macrocephala              | R | C | C |   | C | C | C | 0.29 |   |
| (Parandrena)     | concinnulla               |   |   | S |   |   | R |   | 1    |   |
| (Pelicanandrena) | atypica                   | S | R | C | R | R | R | R | 0.14 | N |
| (Plastandrena)   | prunorum                  |   |   |   |   |   | S |   | 0.57 |   |
| (Psammandrena)   | congrua                   |   | R | R |   |   | R | R | 0.29 |   |
| (Ptilandrena)    | pallidiscopa              |   |   | R |   |   |   | R | 0.14 | A |
| (Scaphandrena)   | lomatii                   |   |   | S |   |   |   |   | 0.14 | A |
|                  | plana                     |   |   | R |   |   |   |   | 0.57 |   |
|                  | santaclarae               |   | S | R |   |   | R | R | 0.29 |   |
| (Scolianandrena) | cryptanthae               | R |   |   |   |   | R |   | 0.43 |   |
|                  | osmioides                 |   |   | R |   |   | R | S | 0.14 | A |
| (Scrapteropsis)  | biareola                  |   |   | R |   |   |   |   | 0.86 |   |
| (Simandrena)     | angustitarsata            | R | R | C | C |   | C | C | 0.29 | N |
|                  | hypoleuca                 |   |   |   |   |   | S | R | 0.43 |   |
|                  | orthocarpus               |   |   | R |   |   | R | R | 0.86 |   |
|                  | pallidifovea              | S | R | R | R |   | R | R | 1    |   |
| (Thysandrena)    | candida                   | C | C | C | C | R | C | C | 0.43 |   |
|                  | knuthiana                 |   |   |   |   | S | C | C | 0.29 | A |
|                  | vierecki                  |   | S | S |   |   |   |   |      |   |

|        |            |                    |                             |   |   |   |   |   |  |   |      |   |
|--------|------------|--------------------|-----------------------------|---|---|---|---|---|--|---|------|---|
|        |            |                    | w-scripta                   | R | R | C | C |   |  | S | 0.71 |   |
|        |            | (Trachandrena)     | fuscicauda                  |   |   | S | R |   |  |   | 0.29 | A |
|        |            |                    | semipunctata                |   | R | S |   |   |  | S | 0.43 |   |
|        |            | (Tylandrena)       | subaustralis                |   |   |   |   |   |  | S | 0.14 | N |
|        |            |                    | subtilis                    |   |   |   | S |   |  |   | 0.14 | A |
|        |            |                    | waldmeri                    |   |   |   | R |   |  |   | 0.14 | A |
|        | Calliopsis | (Micronomadopsis)  | fracta                      | R | S | R |   |   |  | S | 0.57 |   |
|        |            |                    | helianthi                   |   |   |   |   | R |  | S | 0.29 |   |
|        |            |                    | mellipes                    |   | S |   |   |   |  | R | 0.29 |   |
|        |            |                    | trifolii                    | R |   |   | R |   |  |   | 0.29 | A |
|        |            | (Nomadopsis)       | anthidia                    | S | R | R |   | S |  | S | 0.71 |   |
|        |            |                    | obscura                     | R | C | R | R | C |  | C | 1    |   |
|        |            |                    | zonalis                     | S | S |   | S |   |  |   | 0.43 | A |
|        |            |                    | smithi                      | C | C | C | C |   |  | S | 0.71 |   |
|        | Macrotera  | (Macroteropsis)    | arcuata                     |   |   | S |   |   |  | S | 0.43 |   |
|        | Panurginus |                    | gracilis                    |   |   | C | R | C |  | C | 0.71 |   |
|        |            |                    | melanocephalus              |   | R | R |   |   |  | C | 0.57 |   |
|        |            |                    | nigrellus                   | C | C | C |   | R |  | C | 0.86 |   |
|        |            |                    | aff. occidentalis           |   |   |   |   | S |  |   | 0.14 | A |
|        | Perdita    | (Hesperoperdita)   | tresignata ssp. ornata      | R | C | C | C |   |  | S | 0.86 |   |
|        |            | (Perdita)          | claypolei ssp. limatula     |   | C | C |   |   |  |   | 0.29 | A |
|        |            |                    | hirticeps ssp. hirticeps    |   |   |   |   | S |  | R | 0.29 |   |
|        |            |                    | n. sp. aff. holoxantha      |   |   |   |   |   |  | S | 0.14 | N |
|        |            |                    | isocornae                   |   | S |   |   |   |  |   | 0.14 | A |
|        |            |                    | jucunda                     |   | R |   | S |   |  |   | 0.29 | A |
|        |            |                    | linsleyi                    | R | R | R | S |   |  | R | 0.71 |   |
|        |            |                    | rhois ssp. reducta          | C | C | C | S |   |  | R | 0.71 |   |
|        |            |                    | salicis ssp. personata      |   |   |   |   |   |  | R | 0.14 | N |
|        |            | (Pygoperdita)      | aureovittata ssp. stenozona |   | S |   |   |   |  |   | 0.14 | A |
|        |            |                    | californica                 |   |   | R |   |   |  |   | 0.14 | A |
|        |            |                    | distropica                  | R | C | C | C | C |  | C | 1    |   |
|        |            |                    | micheneri ssp. micheneri    |   |   | C | R | S |  | R | 0.57 |   |
|        |            |                    | montereyensis               | C | C | C | C | S |  | C | 1    |   |
|        |            |                    | nitens                      | C | C | R |   |   |  | C | 0.71 |   |
| Apidae | Anthophora | (Anthophoroides)   | californica                 | R | C | R | R | S |  | R | 1    |   |
|        |            | (Heliophila)       | columbariae                 |   |   | R |   |   |  |   | 0.14 | A |
|        |            |                    | curta                       | R | R | S | R |   |  | R | 0.86 |   |
|        |            |                    | estebana                    |   | S |   |   |   |  |   | 0.14 | A |
|        |            |                    | flavocincta                 |   |   |   |   | S |  |   | 0.14 | A |
|        |            | (Lophanthophora)   | pacifica                    |   | R | C |   |   |  | S | 0.43 |   |
|        |            | (Melea)            | bomboides                   | S |   |   |   |   |  |   | 0.14 | A |
|        |            | (Mystacanthophora) | urbana                      | R | C | C | C | S |  | C | 1    |   |
|        |            | (Paramegilla)      | centriformis                | R | C | R | C |   |  | R | 0.71 |   |
|        |            | (Pyganthophora)    | crotchii                    | R | C | R | R | S |  | C | 1    |   |
|        |            |                    | edwardsii                   | R | R | R |   |   |  | C | 0.71 |   |
|        |            |                    | platti                      | C | C | C | R |   |  | C | 0.86 |   |

|              |                  |                       |   |   |   |   |   |   |       |      |   |
|--------------|------------------|-----------------------|---|---|---|---|---|---|-------|------|---|
| Anthophorula | (Anthophorisca)  | nitens                |   |   |   |   |   | C | C     | 0.57 |   |
|              | (Anthophorula)   | albicans              |   |   |   |   |   |   | R S C | 0.71 |   |
| Apis         |                  | mellifera             | R | C | C | C | C | C | C     | 1    |   |
| Bombus       | (Crotchiibombus) | crotchii              |   | C | C | S |   |   |       | 0.43 | A |
|              | (Fervidobombus)  | californicus          | R | C | C | R | R | R | R     | 1    |   |
|              | (Pyrobombus)     | caliginosus           |   | C |   |   |   | S | S     | 0.43 |   |
|              |                  | melanopygus           | R | C | C | R | R | C | R     | 1    |   |
|              |                  | vandykei              |   | R | R |   |   | R |       | 0.43 |   |
|              |                  | vosnesenskii          | R | C | C | S | S | C | R     | 1    |   |
| Brachynomada | (Melanomada)     | melanantha            |   |   |   |   |   |   | R     | 0.14 | N |
| Centris      | (Paracentris)    | aff. californica      |   | C | C | R |   |   |       | 0.43 | A |
| Ceratina     | (Ceratina)       | arizonensis           | C | C | C | C | C | C | C     | 1    |   |
|              | (Euceratina)     | dallatorreana         |   |   | S |   |   | R | C     | 0.43 |   |
|              | (Zadontomerus)   | acantha               | S | C | R |   |   | R | C     | 0.86 |   |
|              |                  | hurdi                 | S | R | R |   |   | R | C     | 0.86 |   |
|              |                  | nanula                | R | C | C | C | C | C | C     | 1    |   |
|              |                  | aff. nanula           | S | R | S |   |   | S | R     | 0.86 |   |
|              |                  | pacifica              |   | R | S |   |   | S | R     | 0.57 |   |
|              |                  | punctigena            | S | C | R | C |   | R | S     | 0.86 |   |
|              |                  | sequoiae              | R | C | C | C | R | C | C     | 1    |   |
|              |                  | tejonensis            |   | C | R |   |   | R |       | 0.43 |   |
|              |                  | timberlakei           |   | R | R | R |   | R | S     | 0.71 |   |
| Diadasia     |                  | aff. ochracea         |   | S | S |   |   | S | R     | 0.71 |   |
|              |                  | angusticeps           |   | R | R | C | R | C | C     | 0.86 |   |
|              |                  | australis             |   |   |   |   |   | S | S     | 0.29 |   |
|              |                  | bituberculata         | R | C | R | C | C | C | C     | 1    |   |
|              |                  | consociata            |   |   |   |   |   |   | R     | 0.14 | N |
|              |                  | laticauda             |   | C | C | R | R | C | C     | 0.86 |   |
|              |                  | nigrifrons            |   |   |   |   |   | S |       | 0.14 | N |
|              |                  | nitidifrons           |   | R | C | R | R | C | C     | 0.86 |   |
|              |                  | rinconis              |   |   |   |   |   |   | R     | 0.14 | N |
| Epeolus      |                  | americanus            | S | R |   |   |   | S | R     | 0.71 |   |
|              |                  | compactus             |   |   | R | S |   |   | S     | 0.43 |   |
|              |                  | mesillae              |   |   |   |   |   | S | R     | 0.29 | N |
|              |                  | minimus               |   |   |   | S | S |   | S     | 0.43 |   |
| Eucera       | (Synhalonia)     | actuosa               |   | S | R | R | C | C | C     | 0.86 |   |
|              |                  | amsinckiae            | R | R | R |   | R | R | R     | 0.86 |   |
|              |                  | cordleyi              |   | R | C |   | S | C | R     | 0.71 |   |
|              |                  | delphinii             |   | C | R | S | S | R | R     | 0.86 |   |
|              |                  | dorsata               |   | C | R | R | S | C | C     | 0.86 |   |
|              |                  | edwardsii             | S | R | R |   | S |   | R     | 0.71 |   |
|              |                  | lunata                |   |   | R |   |   | R | R     | 0.43 |   |
|              |                  | venusta ssp. carinata | C | C | C | R |   | R | R     | 0.86 |   |
|              |                  | virgata               |   |   | C | S | S | C | C     | 0.71 |   |
| Habropoda    |                  | dammersi              |   |   | R |   |   |   |       | 0.14 | A |
|              |                  | depressa              | S | C | C | R | S | C | C     | 1    |   |

|            |                   |                          |   |   |   |   |   |   |   |      |   |
|------------|-------------------|--------------------------|---|---|---|---|---|---|---|------|---|
|            |                   | tristissima              | R | C | R | S | R | R | C | 1    |   |
| Melecta    | (Melecta)         | pacifica                 |   |   | R |   |   | R |   | 0.43 |   |
|            |                   | separata                 |   |   | S | R | R | R | C | 0.71 |   |
|            | (Melectomimus)    | edwardsii                |   |   | R |   |   | S |   | 0.29 |   |
| Melissodes | (Callimelissodes) | clarkiae                 |   |   | R |   |   | R | R | 0.43 |   |
|            |                   | composita                |   |   |   |   |   |   | S | 0.14 | N |
|            |                   | lupina                   |   |   | R | C |   | R | C | 0.71 |   |
|            |                   | lustra                   |   |   | S |   |   |   |   | 0.14 | A |
|            |                   | n. sp. 1                 |   |   | R |   | R |   |   | 0.29 | A |
|            |                   | n. sp. 2                 |   |   | R | R | R | S | R | 0.86 |   |
|            |                   | nigracauda               |   |   |   |   | S |   |   | 0.14 | A |
|            |                   | plumosa                  |   |   | R |   |   |   | R | 0.43 |   |
|            |                   | stearnsi                 |   |   | R | S |   | C | C | 0.71 |   |
|            | (Eumelissodes)    | paulula                  |   |   | R |   |   |   |   | 0.14 | A |
|            |                   | velutina                 |   |   |   |   |   |   | R | 0.14 | N |
|            | (Melissodes)      | tepida                   |   |   |   |   |   |   | C | 0.14 | N |
| Neopasites | (Micropasites)    | sp. 4                    |   |   |   |   |   |   | S | 0.14 | N |
| Nomada     | (Centrias)        | crotchii spp. crotchii   |   |   | R | S |   |   |   | 0.29 | A |
|            |                   | crotchii ssp. nigrior    |   |   |   | C |   |   | R | 0.43 |   |
|            |                   | sp. A                    | S |   | R |   |   |   |   | 0.29 | A |
|            | (Holonomada)      | edwardsii spp. edwardsii |   |   | R | R |   |   | S | 0.43 |   |
|            | (Nomada)          | sp. A                    | R |   | R | S |   |   | R | 0.71 |   |
|            |                   | sp. AA                   |   |   |   |   |   |   | S | 0.14 | N |
|            |                   | sp. B                    | S |   | S | S |   |   | R | 0.71 |   |
|            |                   | sp. BB                   |   |   |   |   |   | S | R | 0.43 |   |
|            |                   | sp. CC                   |   |   |   |   |   | S |   | 0.29 |   |
|            |                   | sp. D                    | C |   | C | C | S |   |   | 0.57 | A |
|            |                   | sp. DD                   |   |   |   |   |   |   | S | 0.14 | N |
|            |                   | sp. E                    | C |   | R | S | R |   | R | 0.86 |   |
|            |                   | sp. EE                   |   |   |   |   |   |   | R | 0.14 | N |
|            |                   | sp. F                    | S |   |   | R |   |   | S | 0.43 |   |
|            |                   | sp. FF                   |   |   |   |   |   |   | S | 0.14 | N |
|            |                   | sp. G                    |   |   |   |   |   |   | R | 0.29 | N |
|            |                   | sp. GG                   |   |   |   | S |   |   | R | 0.29 |   |
|            |                   | sp. HH                   |   |   |   | S |   | S |   | 0.29 | A |
|            |                   | sp. I                    |   |   |   | S |   |   |   | 0.14 | A |
|            |                   | sp. II                   |   |   |   |   |   | R |   | 0.29 |   |
|            |                   | sp. J                    |   |   |   | S |   |   | S | 0.29 |   |
|            |                   | sp. Q                    |   |   | S | S |   |   | S | 0.43 |   |
|            |                   | sp. R                    |   |   | R | R |   |   |   | 0.29 | A |
|            |                   | sp. S                    |   |   | S |   |   |   |   | 0.14 | A |
|            |                   | sp. T                    |   |   | S |   |   |   |   | 0.14 | A |
|            |                   | sp. U                    |   |   | C | C |   |   | R | 0.57 |   |
|            |                   | sp. V                    | S |   | R | R |   | R | R | 0.86 |   |
|            |                   | sp. W                    |   |   | C | C |   |   | C | 0.57 |   |
|            |                   | sp. X                    |   |   |   | S |   |   | R | 0.43 |   |

|            |                |                 |                           |  |   |   |   |   |   |   |   |      |   |
|------------|----------------|-----------------|---------------------------|--|---|---|---|---|---|---|---|------|---|
|            |                |                 | sp. Y                     |  |   |   | R |   | S |   |   | 0.29 | A |
|            |                |                 | sp. Z                     |  |   |   | C |   |   |   |   | 0.14 | A |
|            | Oreopasites    |                 | aff. hurdi n.sp.          |  |   | S | R | S |   | S | S | 0.71 |   |
|            |                |                 | vanduzeei                 |  | R | R | S | S |   | S |   | 0.71 |   |
|            | Peponapis      | (Peponapis)     | pruinosa                  |  |   |   |   |   |   |   | R | 0.14 | N |
|            | Townsendiella  |                 | ensifera                  |  |   | R | C | C |   |   | R | 0.57 |   |
|            |                |                 | rufiventris               |  |   |   |   | S |   |   |   | 0.14 | A |
|            | Triepeolus     |                 | heterurus                 |  |   |   |   |   |   |   | R | 0.14 | N |
|            |                |                 | melanarius                |  |   |   |   |   |   |   | S | 0.14 | N |
|            |                |                 | sp. P1                    |  |   |   |   |   |   | R | S | 0.29 | N |
|            |                |                 | sp. P2                    |  |   |   |   |   |   | R |   | 0.14 | N |
|            |                |                 | sp. P3                    |  |   |   |   |   |   |   | R | 0.14 | N |
|            |                |                 | sp. P4                    |  |   |   |   | R |   |   |   | 0.14 | A |
|            |                |                 | timberlakei               |  |   | R | R | R |   | S | R | 0.71 |   |
|            |                |                 | aff. timberlakei          |  |   |   |   |   | S |   | R | 0.29 |   |
|            | Xeromelecta    | (Melectomorpha) | californica               |  | R | C | R | C |   | R | R | 0.86 |   |
|            |                | (Xeromelecta)   | larreae                   |  | S |   |   |   |   |   |   | 0.14 | A |
|            | Xylocopa       | (Notoxylocopa)  | tabaniformis ssp. orpifex |  | R | C | R | R | S | R | R | 1    |   |
| Colletidae | Colletes       | consors         | californicus              |  |   |   |   |   |   |   | S | 0.14 | N |
|            |                |                 | consors ssp. pascoensis   |  | C | C | R | R |   | C | R | 0.86 |   |
|            |                | daleae          | aff. algarobiae           |  | S | C | C | R |   | R | C | 0.86 |   |
|            |                | simulans        | fulgidus ssp. fulgidus    |  |   | R | R | R |   |   | R | 0.57 |   |
|            |                |                 | simulans ssp. nevadensis  |  |   | S |   |   |   |   |   | 0.14 | A |
|            |                |                 | slevini                   |  | R | C | C | C |   | R | R | 0.86 |   |
|            | Hylaeus        | (Cephalylaeus)  | nunenmacheri              |  |   |   |   | S | R |   |   | 0.29 | A |
|            |                | (Hylaeus)       | bisinuatus                |  |   | S |   |   |   |   |   | 0.14 | A |
|            |                |                 | conspicuus                |  |   |   |   | R | R |   | R | 0.43 |   |
|            |                |                 | granulatus                |  |   | C | C | C | S | R | R | 0.86 |   |
|            |                |                 | mesillae ssp. cressoni    |  | R | C | C | C | S | C | C | 1    |   |
|            |                |                 | rudbeckiae                |  | R |   |   |   |   | R | R | 0.43 |   |
|            |                |                 | verticalis                |  | R | C | C | C |   | R | R | 0.86 |   |
|            |                | (Paraprosopis)  | aff. cookii n.sp.         |  |   | R | R | R |   |   |   | 0.43 | A |
|            |                |                 | calvus                    |  | R |   | C | C |   | R | C | 0.71 |   |
|            |                |                 | coloradensis              |  |   |   | C | C | R |   |   | 0.43 | A |
|            |                |                 | n. sp.2                   |  |   |   | C | R | R | R |   | 0.57 |   |
|            |                |                 | nevadensis                |  | C | C | C | C |   | R | C | 0.86 |   |
|            |                |                 | polifolii                 |  |   |   | C | C | C | R |   | 0.57 |   |
|            |                | (Prosopis)      | aff. episcopalis          |  | C | C | C | C |   | R | R | 0.86 |   |
|            |                | (Spatulariella) | punctatus                 |  |   |   |   | S |   |   |   | 0.14 | A |
| Halictidae | Agapostemon    | (Agapostemon)   | femoratus                 |  |   |   |   |   | R | R |   | 0.29 |   |
|            |                |                 | texanus                   |  | R | R | R | C | C | C | C | 1    |   |
|            | Augochlorella  | (Augochlorella) | pomoniella                |  |   | R | R |   |   |   | R | 0.43 |   |
|            | Conanthalictus | (Phaceliapis)   | bakeri                    |  |   | S | R | S |   | R | S | 0.71 |   |
|            |                |                 | seminiger                 |  |   |   |   | S |   |   | S | 0.29 |   |
|            | Dufourea       |                 | dentipes                  |  |   |   |   |   |   | S |   | 0.14 | N |
|            |                |                 | leachi                    |  | S | S | C | R | R | R | C | 1    |   |

|                |                  |                  |   |   |   |   |   |   |   |      |      |
|----------------|------------------|------------------|---|---|---|---|---|---|---|------|------|
|                |                  | mulleri          |   | R | R |   |   | R |   | 0.43 |      |
|                |                  | rhamni           | R | R | R |   |   |   | S | 0.57 |      |
|                |                  | sandhouseae      |   | C | C |   |   | C | C | 0.57 |      |
|                |                  | sparsipunctata   | C | C | R | R | C | C | C | 1    |      |
|                |                  | virgata          | C | R | S | S |   | R | R | 0.86 |      |
| Halictus       | (Nealictus)      | farinosus        | C | C | C | C | C | C | C | 1    |      |
|                | (Odontalictus)   | ligatus          |   |   |   |   | R | C | C | 0.57 |      |
|                | (Protohalictus)  | rubicundus       |   |   |   |   |   | S |   | 0.14 | A    |
|                | (Seladonia)      | tripartitus      | C | C | C | C | C | C | C | 1    |      |
| Lasioglossum   | (Dialictus)      | albohirtum       |   |   |   |   | R | S | R | 0.43 |      |
|                |                  | brunneiventre    |   | R | R | R |   | C | C | 0.71 |      |
|                |                  | diversopunctatum |   |   | S |   |   | R |   | 0.29 |      |
|                |                  | hudsoniellum     |   |   |   |   |   | S | R | 0.29 | N    |
|                |                  | imbrex           | R | C | C | C |   | C | C | 0.86 |      |
|                |                  | cf. impavidum    |   |   |   |   |   |   | S | 0.14 | N    |
|                |                  | incompletum      | R | R | C | C |   | C | C | 0.86 |      |
|                |                  | megastictum      |   |   | S |   |   | R |   | 0.29 |      |
|                |                  | nevadense        | R | C | C | C |   | C | C | 0.86 |      |
|                |                  | perichlarum      |   |   |   |   |   | R |   | 0.14 | N    |
|                |                  | petrellum        |   | S |   |   |   |   |   | 0.14 | A    |
|                |                  | punctatoventre   | R | C | C | C |   | C | C | 0.86 |      |
|                |                  | aff. ruidosense  | R | R |   | R |   |   |   | 0.43 | A    |
|                | (Evyllaesus)     | argemonis        | R | C | C | C |   | C | C | 0.86 |      |
|                |                  | giffardi         |   |   |   |   |   | S | C | R    | 0.43 |
|                |                  | robustum         |   | S | R | C |   | C | C | 0.71 |      |
|                | (Hemihalictus)   | aspilurum        |   | S |   | S |   | R | R | 0.57 |      |
|                |                  | glabriventre     | R | R | R | C |   | C | C | 0.86 |      |
|                |                  | kincaidii        | R | R | S | S |   | R | R | 0.86 |      |
|                |                  | ovaliceps        |   | S | R |   |   | S |   | 0.43 |      |
|                |                  | ruficorne        | R | R | C | C |   | C | R | 0.86 |      |
|                |                  | sequoiae         | S |   | R | C |   | C | C | 0.71 |      |
|                | (Lasioglossum)   | egregium         |   | S | R | R |   | C | C | 0.71 |      |
|                |                  | mellipes         |   |   |   |   | R | C | R | 0.43 |      |
|                |                  | sisymbrii        | R | C | C | C | C | C | C | 1    |      |
|                |                  | titusi           |   |   | S | R |   | C | C | 0.57 |      |
|                | (Sphecodogastra) | allonotum        |   |   | S |   |   | R | R | 0.43 |      |
|                |                  | aff. avalonense  |   | S | R | C |   | C | C | 0.71 |      |
|                |                  | miguelense       |   | S |   | R |   | R | C | 0.57 |      |
|                |                  | nigrescens       | C | C | C | C |   | C | C | 0.86 |      |
|                |                  | sp. 16           |   |   |   | R |   | C | C | 0.43 |      |
| Micralictoides |                  | altadenae        |   | S |   |   |   | R |   | 0.29 |      |
|                |                  | ruficaudus       | R | R | S |   |   | C | R | 0.71 |      |
| Sphecodes      |                  | arvensiformis    | S | R |   |   | S | S | R | 0.71 |      |
|                |                  | sp. B            | R | C | C | R |   | R | R | 0.86 |      |
|                |                  | sp. C            | R |   |   |   |   |   |   | 0.14 | A    |
|                |                  | sp. D            | R |   | S | R |   | R | R | 0.71 |      |

|              |              |                  |                              |                              |   |   |   |   |   |   |      |      |   |
|--------------|--------------|------------------|------------------------------|------------------------------|---|---|---|---|---|---|------|------|---|
|              |              |                  | sp. E                        | S                            | R | R | C | R | C | C | 1    |      |   |
|              |              |                  | sp. F                        | S                            | R |   |   |   |   |   | 0.29 | A    |   |
|              |              |                  | sp. I                        |                              | S |   |   |   |   |   | 0.14 | A    |   |
|              |              |                  | sp. J                        |                              | R |   |   |   |   |   | 0.14 | A    |   |
|              |              |                  | sp. K                        |                              | S |   |   |   |   |   | 0.14 | A    |   |
|              |              |                  | sp. L                        |                              | S | R | C |   | R |   | 0.57 |      |   |
|              |              |                  | sp. M                        |                              |   |   |   |   |   | S | 0.14 | N    |   |
| Megachilidae | Anthidiellum | (Loyalanthidium) | robertsoni                   |                              | C | C |   |   | R |   | 0.43 |      |   |
|              | Anthidium    | (Anthidium)      | collectum                    | R                            | C | C | C | R | R | R | 1    |      |   |
|              |              |                  | edwardsii                    |                              |   |   |   |   |   | R | 0.14 | N    |   |
|              |              |                  | jocosum                      |                              |   |   |   |   |   | R | 0.14 | N    |   |
|              |              |                  | maculosum                    |                              | S |   |   |   |   |   | 0.14 | A    |   |
|              |              |                  | mormonum                     | S                            | R | S | R |   |   |   | 0.57 | A    |   |
|              |              |                  | pallidicypeum                | R                            | S | R | S | S |   |   | 0.71 | A    |   |
|              |              |                  | utahense                     | C                            | C | C | C | C | C | C | C    | 1    |   |
|              |              |                  | (Callanthidium)              | illustre                     |   | C | R | R |   | S | R    | 0.71 |   |
|              |              | Ashmeadiella     | (Arogochila)                 | aff. salviae n. sp. 2        |   |   |   |   |   | S |      | 0.14 | N |
|              |              |                  |                              | australis                    |   | R | R | R |   |   | S    | 0.57 |   |
|              |              |                  |                              | salviae                      | R | C | C | R | S | R | C    | 1    |   |
|              |              |                  |                              | timberlakei                  | C | C | C | C |   | R | R    | 0.86 |   |
|              |              |                  | (Ashmeadiella)               | altadenae                    |   |   |   |   |   | R | R    | 0.29 | N |
|              |              |                  |                              | aridula                      |   |   |   |   | R |   | C    | 0.29 |   |
|              |              |                  |                              | bucconis                     |   | C | R |   |   |   | R    | 0.43 |   |
|              |              |                  |                              | cactorum ssp. basalis        |   | R |   |   |   |   | R    | 0.29 |   |
|              |              |                  |                              | californica ssp. californica | R | C | C | C | R | R | C    | 1    |   |
|              |              |                  |                              | difugita ssp. emarginatula   |   | R | R |   |   | S | R    | 0.57 |   |
|              |              |                  |                              | femorata                     |   | R |   | C |   |   |      | 0.29 | A |
|              |              |                  |                              | foveata                      | S | C | C | C |   | S |      | 0.71 |   |
|              |              |                  |                              | gillettei ssp. cismontanica  |   | S | S |   |   |   |      | 0.29 | A |
|              |              |                  |                              | meliloti                     |   | C | C |   |   |   |      | 0.29 | A |
|              |              |                  |                              | pronitens                    |   | S |   |   |   |   |      | 0.14 | A |
|              |              |                  |                              | aff. rufitarsis              | R | R | R | R |   |   |      | 0.57 | A |
|              |              |                  |                              | sonora                       |   | R | S |   | S |   | R    | 0.57 |   |
|              |              |                  |                              | titusi                       |   | C | R | S |   |   | S    | 0.57 |   |
|              |              | Atoposmia        | (Atoposmia)                  | n. sp. 2                     | R | R | S |   |   | S |      | 0.57 |   |
|              |              |                  |                              | pycnognatha                  |   | C | R | S |   |   |      | 0.43 | A |
|              |              |                  | (Eremosmia)                  | hemizoniae                   |   |   |   |   |   | S |      | 0.14 | N |
|              |              |                  | (Hexosmia)                   | copelandica ssp. copelandica | R | C | R | R | S | R | R    | 1    |   |
|              |              | Chelostoma       | (Chelostoma)                 | aff. minutum n.sp.           |   | R | R | R |   |   | S    | 0.57 |   |
|              |              |                  |                              | californicum                 | C | C | C | C | S | C | R    | 1    |   |
|              |              |                  | cockerelli                   | C                            | C | C | C | R | C | C | 1    |      |   |
|              |              |                  | incisulum                    | C                            | C | C | C |   | C | R | 0.86 |      |   |
|              |              |                  | marginatum ssp. incisuloides | C                            | C | C | R |   | C | R | 0.86 |      |   |
|              |              |                  | phaceliae                    | C                            | C | C | C |   | C | R | 0.86 |      |   |
|              |              |                  | tetramerum                   | R                            | C | C | R |   | S | R | 0.86 |      |   |



|           |                  |                            |                      |   |   |   |   |   |   |      |      |      |   |
|-----------|------------------|----------------------------|----------------------|---|---|---|---|---|---|------|------|------|---|
| Coelioxys | (Boreocoelioxys) | octodentata                |                      | R | R | S |   |   | S | 0.57 |      |      |   |
|           | (Coelioxys)      | hirsutissima               |                      |   |   |   |   |   | R | 0.14 | N    |      |   |
|           |                  | sericaudata                | S                    | R | R | R | S |   | R | R    | 1    |      |   |
|           | (Cyrtocoelioxys) | gilensis                   |                      | S |   |   |   |   |   |      | 0.14 | A    |   |
|           |                  | gonaspis                   |                      | R |   |   |   |   |   |      | 0.14 | A    |   |
|           | Dianthidium      | (Dianthidium)              | dubium ssp. dilectum |   | C | C | R | R | R | C    | 0.86 |      |   |
|           |                  | parvum ssp. schwarzi       |                      |   |   |   |   | R | R | R    | 0.43 |      |   |
|           |                  | pudicum ssp. consimile     | S                    | S | S | R | R | R | R | C    | 1    |      |   |
|           |                  | singulare                  |                      | S |   |   |   |   |   |      | 0.14 | A    |   |
|           |                  | ulkei ssp. ulkei           |                      | R | S |   |   | S |   | R    | 0.57 |      |   |
| Dioxys    |                  | aurifusca                  |                      | S |   |   |   |   |   |      | 0.14 | A    |   |
|           |                  | pacifica ssp. pacifica     |                      |   |   | S |   | S |   | R    | 0.43 |      |   |
|           |                  | pomona ssp. pomona         | R                    | R | R | R |   |   | C | R    | 0.86 |      |   |
|           |                  | producta ssp. cismontanica | R                    | R | R | R |   |   | R | S    | 0.86 |      |   |
| Heriades  | (Neotrypetes)    | occidentalis               |                      | C | C |   |   |   |   |      | 0.29 | A    |   |
| Hoplitis  | (Acrosmia)       | aff. emarginata            |                      | C | R | R |   |   | S |      | 0.57 |      |   |
|           | (Alcidamea)      | colei                      | R                    | C | R | C | R |   | C | C    | 1    |      |   |
|           |                  | grinnelli                  | R                    | C | R | R |   |   |   | R    | 0.71 |      |   |
|           |                  | producta ssp. bernardina   |                      | C |   |   |   |   | C | S    | 0.43 |      |   |
|           |                  | producta ssp. gracilis     | C                    | C | C | C | R |   | C | R    | 1    |      |   |
|           |                  | sambuci                    | S                    | C | R | S |   |   |   | S    | 0.71 |      |   |
|           | (Cyrtosmia)      | hypocrita                  | S                    | C | C | R |   |   | R | R    | 0.86 |      |   |
|           | (Hoplitina)      | bunocephala                | S                    |   | S |   |   |   |   |      | 0.29 | A    |   |
|           |                  | howardi                    | C                    | C | C | C |   |   | R | R    | 0.86 |      |   |
|           | (Monumetha)      | albifrons ssp. maura       | C                    | C | C | C | C |   | C | C    | 1    |      |   |
|           |                  | fulgida ssp. platyura      | C                    | C | C | C | R |   | C | R    | 1    |      |   |
|           | (Penteriades)    | remotula                   | R                    | C | R |   |   | S | R | S    | 0.86 |      |   |
|           | (Proteriades)    | cryptanthae                | R                    | R |   |   |   | S |   |      | 0.43 | A    |   |
|           |                  | jacintana                  | C                    | C | S | R |   |   | R |      | 0.71 |      |   |
|           |                  | nanula                     | R                    | C | S | R |   |   | R |      | 0.71 |      |   |
|           |                  | seminigra                  | S                    | C | R | S |   |   | S |      | 0.71 |      |   |
|           |                  | semirubra                  | R                    | R | R | S | R |   | R | R    | 1    |      |   |
| Megachile | (Argyropile)     | parallela                  |                      | S |   |   |   |   |   |      | 0.14 | A    |   |
|           | (Chelostomoides) | angularum                  |                      | C | C |   |   |   | R | R    | 0.57 |      |   |
|           |                  | davidsoni                  |                      | C |   |   |   |   | S | S    | 0.43 |      |   |
|           |                  | exilis                     |                      |   |   |   |   |   |   | R    | 0.14 | N    |   |
|           |                  | spinotulata                |                      | C | R |   |   |   |   |      | 0.29 | A    |   |
|           |                  | (Eutricharaea)             | apicalis             |   | C | R |   | R | S | C    | 0.71 |      |   |
|           |                  | (Litomegachile)            | coquilletti          | S | C | C | S | R | C | C    | 1    |      |   |
|           |                  |                            | gentilis             |   | R | S |   |   |   | R    | 0.43 |      |   |
|           |                  |                            | lippiae              |   |   |   |   |   |   | R    | 0.14 | N    |   |
|           |                  |                            | onobrychidis         |   |   |   | R | S | R | R    | C    | 0.71 |   |
|           |                  |                            | texana               | S | R | R | R |   |   |      |      | 0.57 | A |
|           |                  | (Megachile)                | montivaga            |   | R |   |   |   | S | S    | R    | 0.57 |   |
|           | (Megachiloides)  | gravita                    |                      | R |   | C | R | C | C | 0.71 |      |      |   |
|           |                  | pascoensis                 | R                    | C | R | C | R | C | C | 1    |      |      |   |

|       |                   |                              |   |   |   |   |   |   |      |      |   |
|-------|-------------------|------------------------------|---|---|---|---|---|---|------|------|---|
|       |                   | pseudonigra                  | S | R |   |   | R |   | 0.43 |      |   |
|       |                   | subnigra ssp. angelica       |   |   | R | R | C | R | 0.57 |      |   |
|       | (Sayapis)         | fidelis                      |   | S | R |   |   | S | 0.43 |      |   |
|       |                   | frugalis ssp. pseudofrugalis |   | C | C |   | S | C | 0.57 |      |   |
|       |                   | inimica ssp. jacumbensis     |   | R |   |   |   |   | 0.14 | A    |   |
|       |                   | newberryae                   |   | R | R |   |   |   | 0.29 | A    |   |
| Osmia | (Acanthosmioides) | nigrifrons                   |   | S |   | R |   |   | 0.29 | A    |   |
|       |                   | nigrobarbata                 | R | S | S | S | S | R | S    | 1    |   |
|       |                   | odontogaster                 | R | C | C | R | S | R | C    | 1    |   |
|       |                   | sedula                       | S | C | R | R | C | R | S    | 1    |   |
|       | (Cephalosmia)     | californica                  | R | R | S | S |   | R | R    | 0.86 |   |
|       |                   | montana ssp. quadriceps      | R | R | R | C | S | C | R    | 1    |   |
|       | (Euthosmia)       | glauca                       | R | C | C | C | C | C | C    | 1    |   |
|       | (Helicosmia)      | coloradensis                 |   | C | C | R |   | R | R    | 0.71 |   |
|       |                   | texana                       |   | C | S | R | R | R | R    | 0.86 |   |
|       | (Melanosmia)      | aglaia                       | R | C | C | C | C | C | C    | 1    |   |
|       |                   | atrocyanea                   | R | C | C | C | C | C | C    | 1    |   |
|       |                   | brevis                       | C | C | C | C | R | C | C    | 1    |   |
|       |                   | calla                        | R | C | C | C | R | C | C    | 1    |   |
|       |                   | cara                         | C | C | C | C | S | C | C    | 1    |   |
|       |                   | clarescens                   | R | C | C | R |   | R | R    | 0.86 |   |
|       |                   | cyanella                     | C | C | C | C | R | C | C    | 1    |   |
|       |                   | cyanopoda                    | S | C | R | R |   |   | S    | 0.71 |   |
|       |                   | densa                        | C | C | C | R | R | C | C    | 1    |   |
|       |                   | gabrielis                    | C | C | C | C | R | C | C    | 1    |   |
|       |                   | gaudiosa                     |   |   |   |   | R | C | R    | 0.43 |   |
|       |                   | granulosa                    | R | C | C | C | R | C | C    | 1    |   |
|       |                   | aff. hesperos                |   |   |   |   |   | S |      | 0.14 | N |
|       |                   | inurbana                     |   |   | R | R | C | C | C    | 0.71 |   |
|       |                   | kincaidii                    | C | C | C | C | R | C | C    | 1    |   |
|       |                   | laeta                        | R | C | C | R | R | C | C    | 1    |   |
|       |                   | malina                       |   |   | S |   |   |   |      | 0.14 | A |
|       |                   | melanopleura                 | C | C | C | C | R | C | R    | 1    |   |
|       |                   | pusilla                      | R | C |   | R | R | R | R    | 0.86 |   |
|       |                   | aff. pusilla                 |   |   |   |   |   | S |      | 0.14 | N |
|       |                   | raritatis                    | R | R | R | R |   | R | R    | 0.86 |   |
|       |                   | regulina                     | R | C | C | C | C | C | C    | 1    |   |
|       |                   | rostrata                     |   |   |   | R |   |   |      | 0.14 | A |
|       |                   | sp. P1                       |   |   |   |   | R |   | R    | 0.29 |   |
|       |                   | tristella                    |   | R | S | R |   |   |      | 0.43 | A |
|       |                   | vandykei                     |   | R | R | R |   |   |      | 0.43 | A |
|       |                   | visenda                      | C | C | C | R | R | C | C    | 1    |   |
|       | (Mystacosmia)     | nemoris                      |   | R | C | C | C | C | C    | 0.86 |   |
|       | (Osmia)           | lignaria ssp. propinqua      | R | C | C | S | R | C | C    | 1    |   |
|       |                   | ribifloris ssp. biedermannii |   | S | S |   |   |   |      | 0.29 | A |
|       | (Pyrosomia)       | nigricollis                  |   |   |   |   |   | S |      | 0.14 | N |

|            |            |                  |                       |   |   |   |   |   |   |   |      |   |
|------------|------------|------------------|-----------------------|---|---|---|---|---|---|---|------|---|
|            |            | (Trichinosmia)   | latisulcata           |   | R | S | R |   | C | S | 0.71 |   |
|            | Protosmia  | (Chelostomopsis) | rubifloris            | C | C | C | C | R | C | C | 1    |   |
|            | Stelis     | (Protostelis)    | anthidioides          | S |   | R |   | S | S |   | 0.57 |   |
|            |            |                  | hurdi                 |   | R | R | R | R | R |   | 0.71 |   |
|            |            | (Stelis)         | aff. foederalis n.sp. |   | S |   | R |   | R |   | 0.43 |   |
|            |            |                  | ashmeadiellae         |   | R | R | R |   | S | S | 0.71 |   |
|            |            |                  | calliphorina          |   | R |   |   |   |   |   | 0.14 | A |
|            |            |                  | chemsaki              |   |   |   |   |   |   | R | 0.14 | N |
|            |            |                  | cockereffi            |   |   |   | R |   | R | R | 0.43 |   |
|            |            |                  | interrupta            |   |   |   |   | S |   | S | 0.29 |   |
|            |            |                  | lateralis             |   | R | R | R |   | R |   | 0.57 |   |
|            |            |                  | micheneri             | S | R |   |   | S | R |   | 0.57 |   |
|            |            |                  | montana               | R | R | R | R | S | R | R | 1    |   |
|            |            |                  | nigriventris          |   | R | R |   |   |   |   | 0.29 | A |
|            |            |                  | occidentalis          | S | R |   |   |   |   | S | 0.43 |   |
|            |            |                  | submarginata          | R | R | R | R |   | S |   | 0.71 |   |
|            | Trachusa   | (Heteranthidium) | timberlakei           |   | R | C | C | R | R | R | 0.86 |   |
|            |            | (Trachusomimus)  | perdita               |   | C | C | C | C | C | R | 0.86 |   |
| Melittidae | Hesperapis | (Amblyapis)      | ilicifoliae           | C | C | C | C | C | C | C | 1    |   |
|            |            | (Panurgomia)     | regularis             | C | C | C | C | C | C | C | 1    |   |
